# Supplementary material for: A crack propagation-based life prediction model for lithium-ion batteries with Ni-rich layered cathodes
Source: Research Square preprint supplement (doi:10.21203/rs.3.rs-608604/v1), 2021-06-24
Supplement: Supplementary file 1 [file 8e9501aa25b8a69420e01a86.docx]

Supporting Information

*of*

A crack propagation-based life prediction model for lithium-ion batteries with Ni-rich layered cathodes

Sun Ho Park1,, Joonam Park1,, Youngjun Roh2, Seoungwoo Byun2, Hyobin Lee2, Seungwon Jung2, Nayeon Kim2, and Yong Min Lee1,2,*

1Energy Science and Engineering Research Center, Daegu Gyeongbuk Institute of Science and Technology (DGIST), Daegu 42988, Republic of Korea

2Department of Energy Science and Engineering, Daegu Gyeongbuk Institute of Science and Technology (DGIST), Daegu 42988, Republic of Korea

*Corresponding author. Tel.: +82-53-785-6425; Fax: +82-53-785-6409

E-mail: yongmin.lee@dgist.ac.kr (Y.M. Lee)

These authors contributed equally


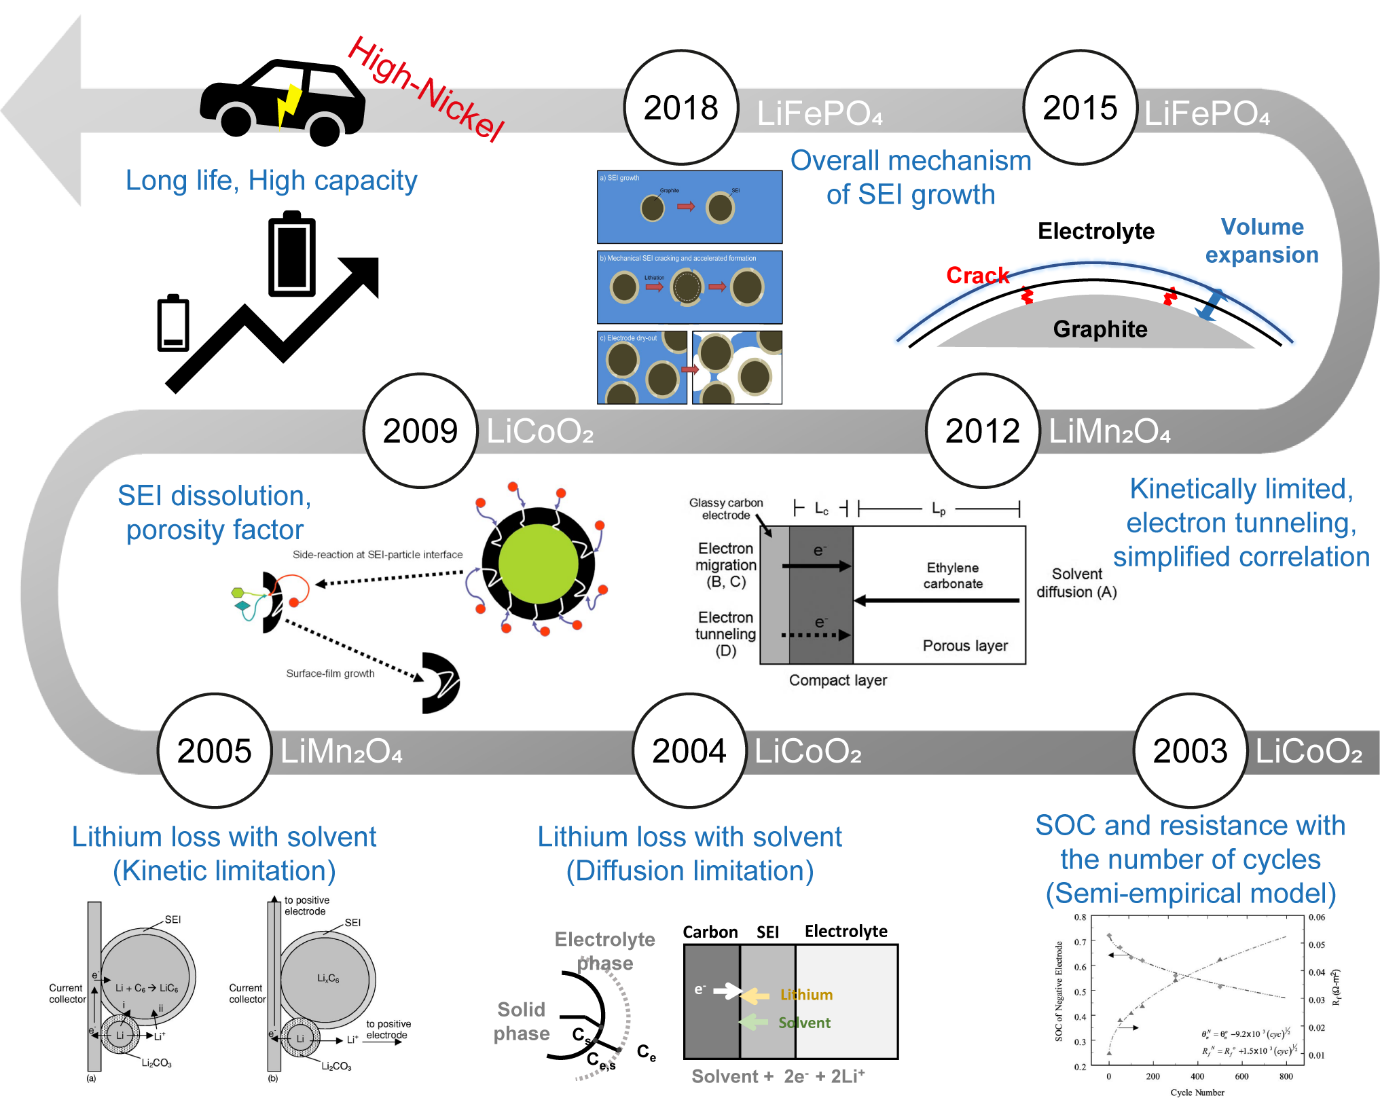


Fig. S1. History of life prediction models for lithium-ion battery (LiB) considering the solid electrolyte interphase (SEI). In 2003, Ramadass et al. showed the variation of the adjustable parameters with cycling and the respective empirical fits (Copyright: Elsevier) [9]. Ploehn et al. suggested solvent diffusion model describing the growth of SEI (Reproduced with permission form ref. [10] Copyright: The Electrochemical Society). In 2005 - 2018, kinetic based life prediction models are introduced with different SEI growth mechanisms (Copyright: The Electrochemical Society) [11-15].


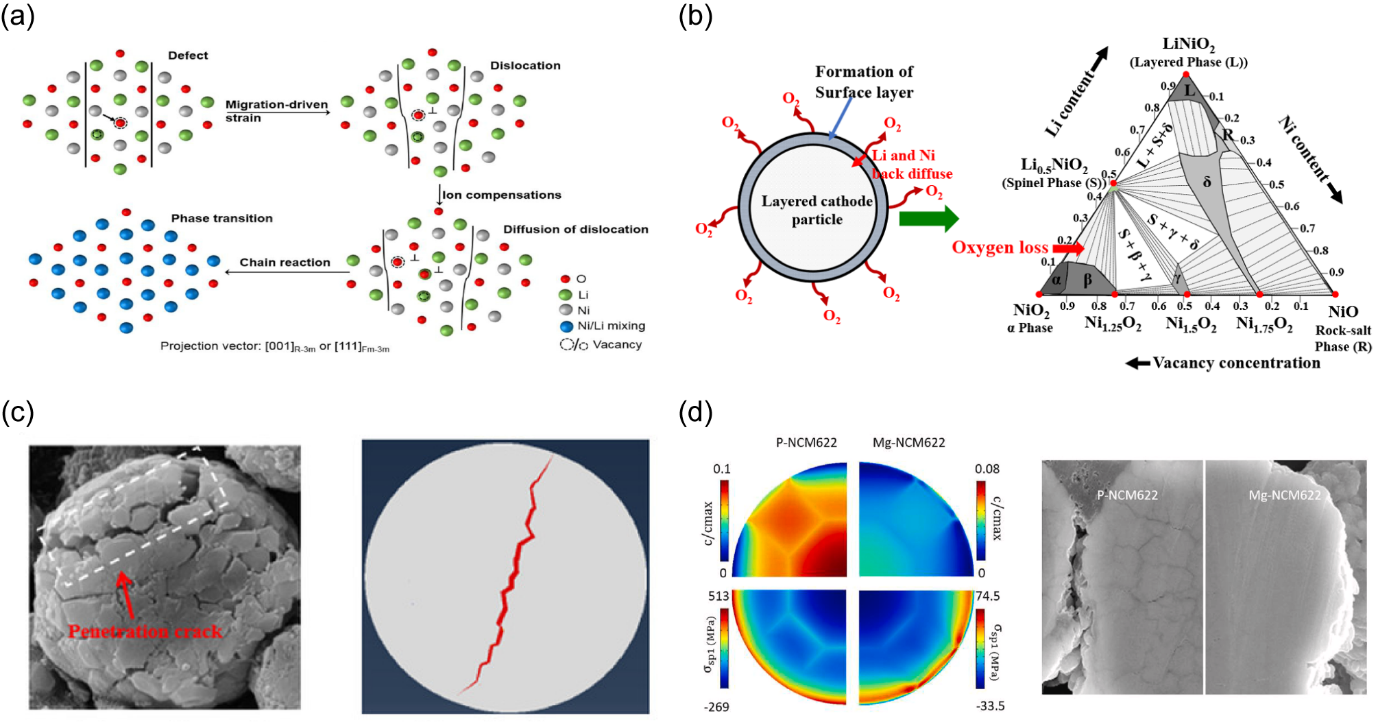


Fig. S2. Degradation results from crack in cathode active material analyzed by (a,b) atomic scale approach, (c,d) microscopic approach. (Copyright: Energy Storage Materials [23], Chemistry of Materials [24], International Journal of Mechanical Sciences [25], Journal of Power Sources [26])


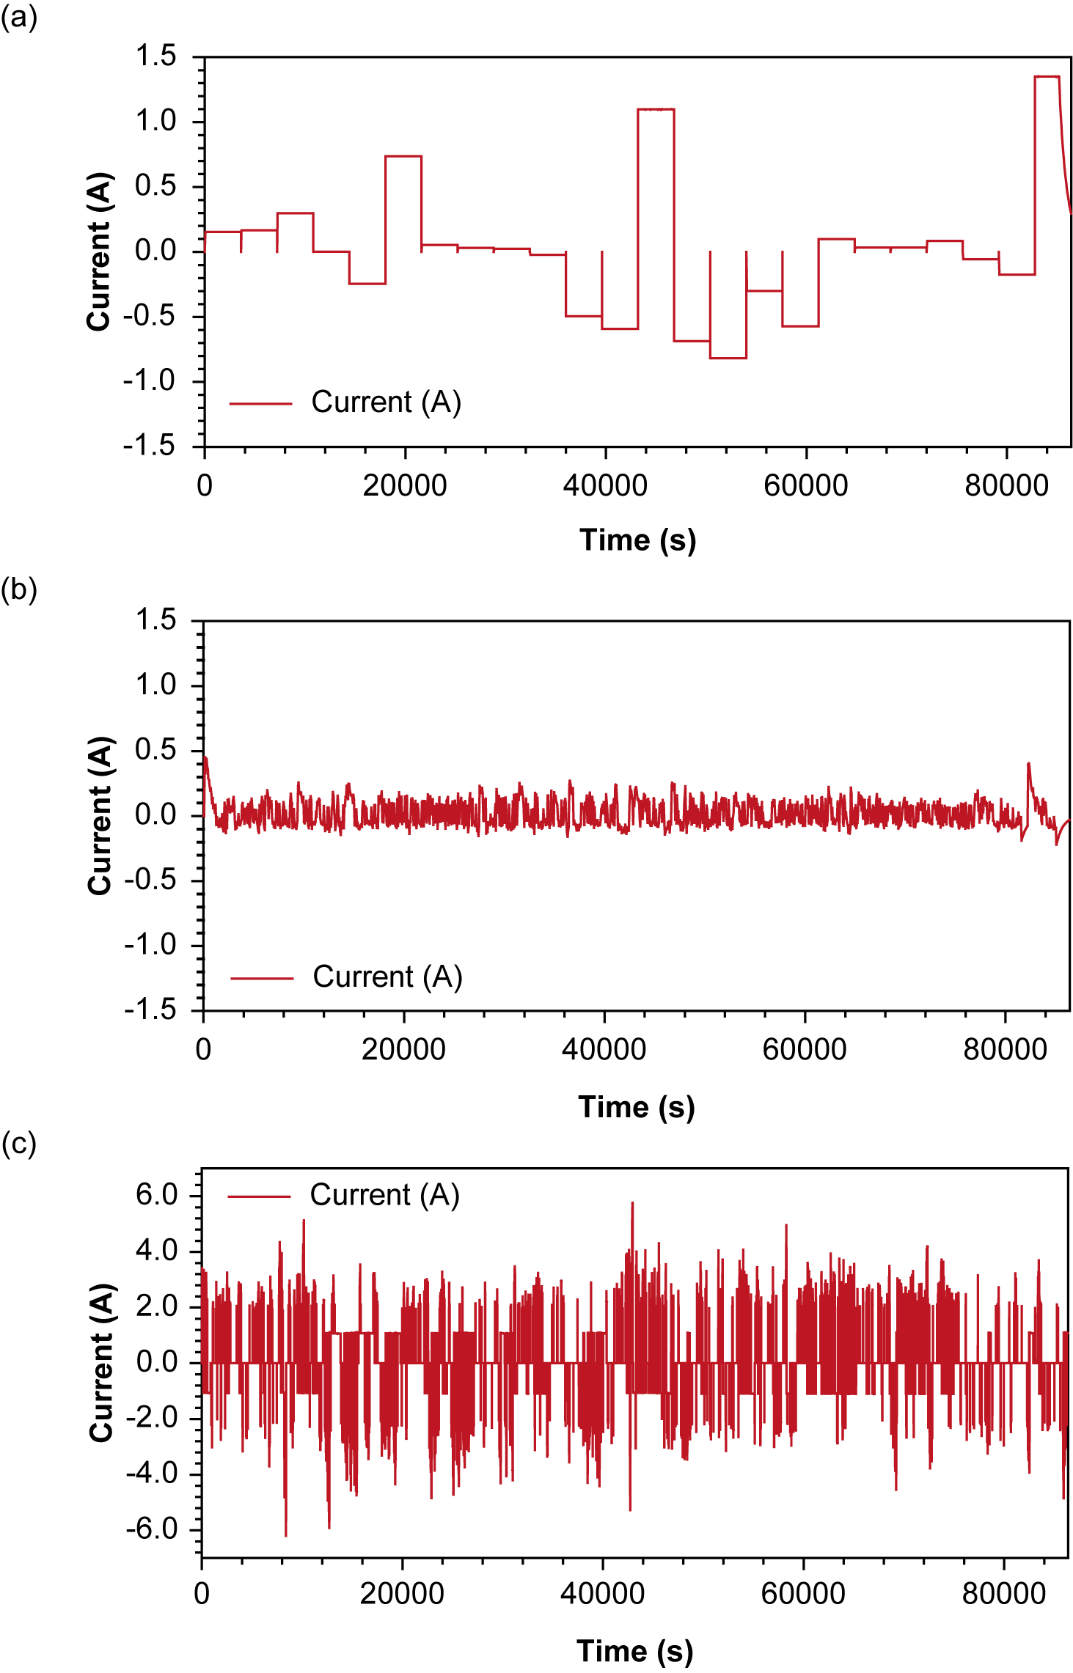


Fig. S3. Time-current history data based on three different ESS operating scenarios (a) peak shaving (PS), (b) renewable integration (RI), and frequency regulation (FR) provided by Korea Electric Power Corporation (KEPCO) research institute


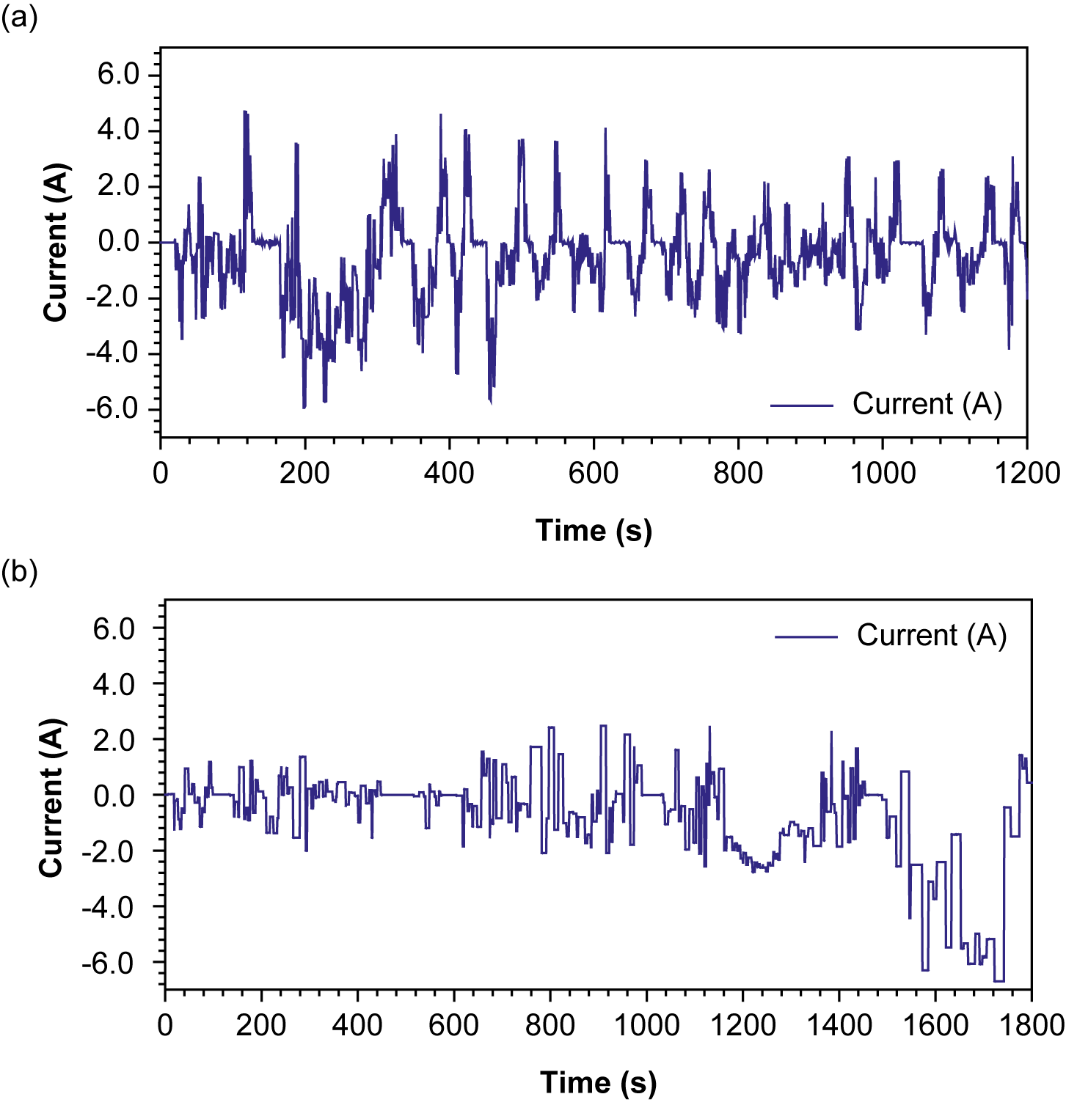


Fig. S4. Time-current history data based on EV operating scenarios.


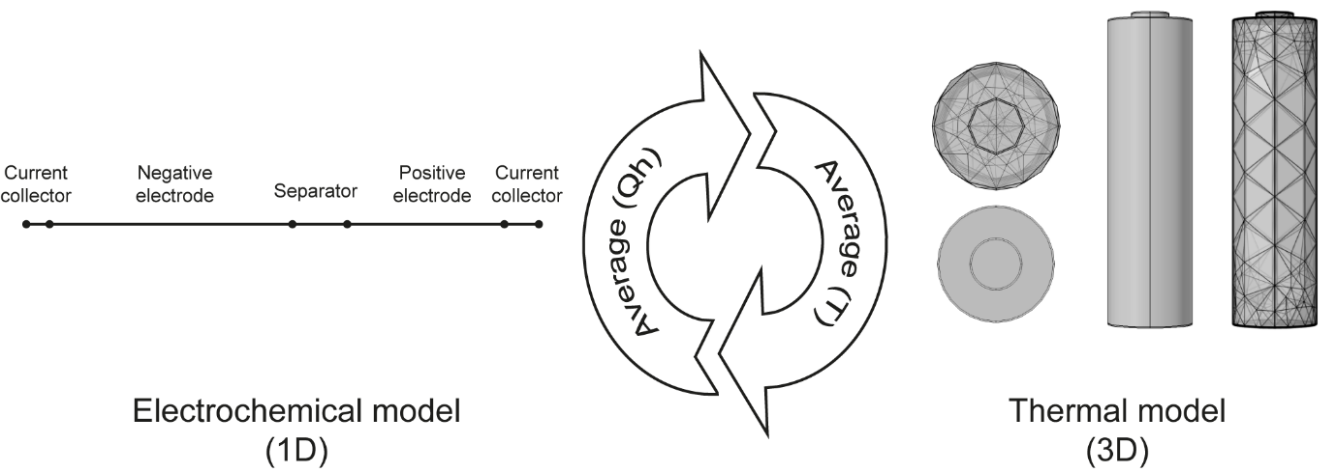


Fig. S5. Schematic diagram of cylindrical cell and dimension for computer modeling
